# Supplementary material for: Bioinspired triangular ZnO nanoclusters synthesized by Argyreia nervosa nascent leaf extract for the efficient electrochemical determination of vitamin C
Source: Royal Society of Chemistry journal article supplement (doi:10.1039/d1ra04704c), 2021-01-01
Supplement: d1ra04704c1.pdf [file d1ra04704c1.pdf]

## **Bioinspired triangular ZnO Nanoclusters Synthesized by *Argyreia Nervosa* nascent leaf extract for efficient electrochemical determination of Vitamin C**

Pooja Singh<sup>1</sup>, Kshitij RB Singh<sup>2</sup>, Jay Singh<sup>3</sup>, Priyanka Prasad<sup>4</sup>, Ravindra Pratap Singh<sup>\*, 1</sup>

<sup>1</sup>Department of Biotechnology, Indira Gandhi National Tribal University, Amarkantak, Madhya Pradesh (484886), India.

<sup>2</sup>Department of Chemistry, Govt. V. Y. T. PG. Autonomous College, Durg, Chhattisgarh, India.

<sup>3</sup>Department of Chemistry, Institute of Science, Banaras Hindu University, Varanasi, Uttar Pradesh (221005), India.

<sup>4</sup>Department of Botany, Indira Gandhi National Tribal University, Amarkantak, Madhya Pradesh (484886), India.

### **\*Corresponding Author:**

Dr. Ravindra Pratap Singh,

Assistant Professor,

Department of Biotechnology,

Faculty of Science,

Indira Gandhi National Tribal University,

Amarkantak, Madhya Pradesh (484886), India.

Email Id- [rpsnpl69@gmail.com](mailto:rpsnpl69@gmail.com), [ravindra.singh@igntu.ac.in](mailto:ravindra.singh@igntu.ac.in)

Mobile No.- +91-91-0934-6565.

## 1. Reproducibility and stability studies of bT-ZnO/ITO electrode

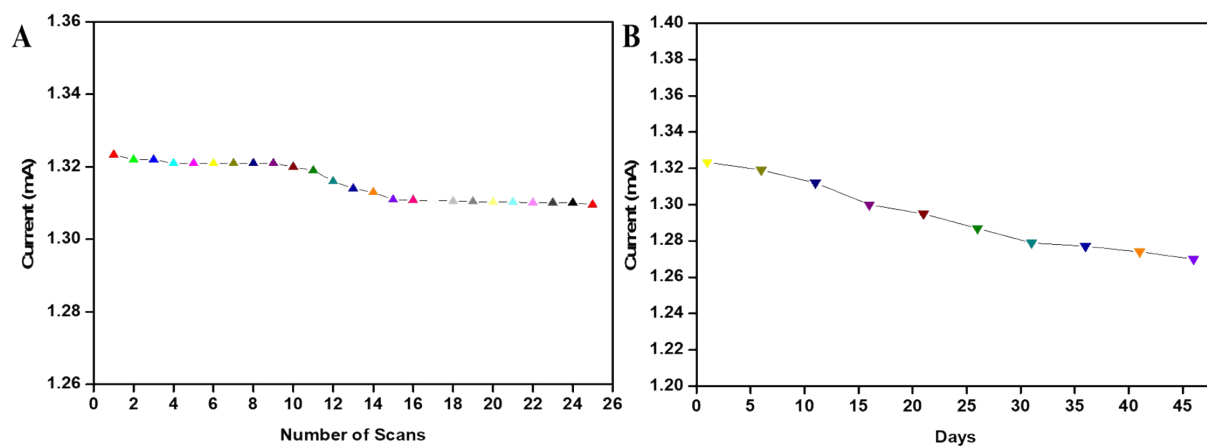

**Supp. Figure 1** bT-ZnO/ITO electrodes: **A)** Reproducibility/reusability study and **B)** Stability/durability study up to 46 days at interval of 5 days.
